# Supplementary material for: The role of coordination chemistry in the development of innovative gallium-based bioceramics: the case of curcumin
Source: Royal Society of Chemistry journal article supplement (doi:10.1039/c0jm03421e), 2011-01-01
Supplement: c0jm03421e.pdf [file c0jm03421e.pdf]

## Electronic Supplementary Information (ESI) Paragraph

**Table S1:** Summary of applied mathematical models together with statistical parameter  $R^2$  for all gel and mesoporous glasses. All models are linearized as:  $y = ax + b$ .  $a$  and  $b$  parameters were extracted by a least-squares fitting of the experimental UV-Vis results.  $f_t$  and  $f_{\%t}$  represent the fraction and fraction percentage respectively of Curcumin released at time  $t$  with respect to the whole quantity of loaded Curcumin on the sample at time 0.

| Model                                                                       | Sample                 | Equation parameters |         |        |
|-----------------------------------------------------------------------------|------------------------|---------------------|---------|--------|
|                                                                             |                        | $a$                 | $b$     | $R^2$  |
| <b>Korsmeyer-Peppas</b><br>$y = \text{Log}(f_{\%t})$<br>$x = \text{Log}(t)$ | SG_curc (0-72 h)       | 0.3512              | 0.7901  | 0.9068 |
|                                                                             | SG_curc (0-4h)         | 0.9002              | 0.5836  | 0.9827 |
|                                                                             | SG_curc (12-48h)       | 0.3014              | 0.8708  | 0.9986 |
|                                                                             | SGGa_curc (0-72 h)     | 0.6519              | 0.1359  | 0.9508 |
|                                                                             | SGGa_curc (0-4h)       | 1.268               | -0.1116 | 0.9965 |
|                                                                             | SGGa_curc (12-48h)     | 0.6124              | 0.2165  | 0.9497 |
|                                                                             | SGP123_curc (0-12 h)   | 0.3651              | 0.9912  | 0.9748 |
|                                                                             | SGGaP123_curc (0-12 h) | 0.4432              | 0.8640  | 0.9131 |
| <b>Weibull</b><br>$y = \text{Log}(-\ln(1-f_t))$<br>$x = \text{Log}(t)$      | SG_curc (0-72 h)       | 0.3791              | -1.201  | 0.9183 |
|                                                                             | SG_curc (0-4h)         | 0.9344              | -1.408  | 0.9843 |
|                                                                             | SG_curc (12-48h)       | 0.3373              | -1.132  | 0.9990 |
|                                                                             | SGGa_curc (0-72 h)     | 0.6771              | -1.869  | 0.9560 |
|                                                                             | SGGa_curc (0-4h)       | 1.281               | -2.110  | 0.9965 |
|                                                                             | SGGa_curc (12-48h)     | 0.6265              | -1.760  | 0.9718 |
|                                                                             | SGP123_curc (0-12 h)   | 0.3981              | -0.988  | 0.9754 |
|                                                                             | SGGaP123_curc (0-12 h) | 0.4731              | -1.120  | 0.9186 |
| <b>Hyperbolic function</b><br>$y = t/(f_{\%t})$<br>$x = t$                  | SG_curc (0-72 h)       | 0.0372              | 0.2763  | 0.9953 |
|                                                                             | SG_curc (0-4h)         | 0.0165              | 0.2420  | 0.6204 |
|                                                                             | SG_curc (12-48h)       | 0.0352              | 0.3715  | 0.9986 |
|                                                                             | SGGa_curc (0-72 h)     | 0.0411              | 1.000   | 0.9786 |
|                                                                             | SGGa_curc (0-4h)       | -0.1312             | 1.383   | 0.8831 |
|                                                                             | SGGa_curc (12-48h)     | 0.0394              | 1.080   | 0.9771 |
|                                                                             | SGP123_curc (0-12 h)   | 0.0361              | 0.0855  | 0.9847 |
|                                                                             | SGGaP123_curc (0-12 h) | 0.0426              | 0.1012  | 0.9942 |
| <b>Higuchi</b><br>$y = f_{\%t}$<br>$x = t^{1/2}$                            | SG_curc (0-72 h)       | 2.394               | 6.733   | 0.9220 |
|                                                                             | SG_curc (0-4h)         | 8.904               | -5.042  | 0.9943 |
|                                                                             | SG_curc (12-48h)       | 2.303               | 7.973   | 0.9950 |
|                                                                             | SGGa_curc (0-72 h)     | 2.384               | -0.419  | 0.9650 |
|                                                                             | SGGa_curc (0-4h)       | 3.656               | -3.056  | 0.9804 |
|                                                                             | SGGa_curc (12-48h)     | 2740                | -1.750  | 0.9410 |
|                                                                             | SGP123_curc (0-12 h)   | 5.755               | 4.513   | 0.9631 |
|                                                                             | SGGaP123_curc (0-12 h) | 5.160               | 3.237   | 0.8988 |

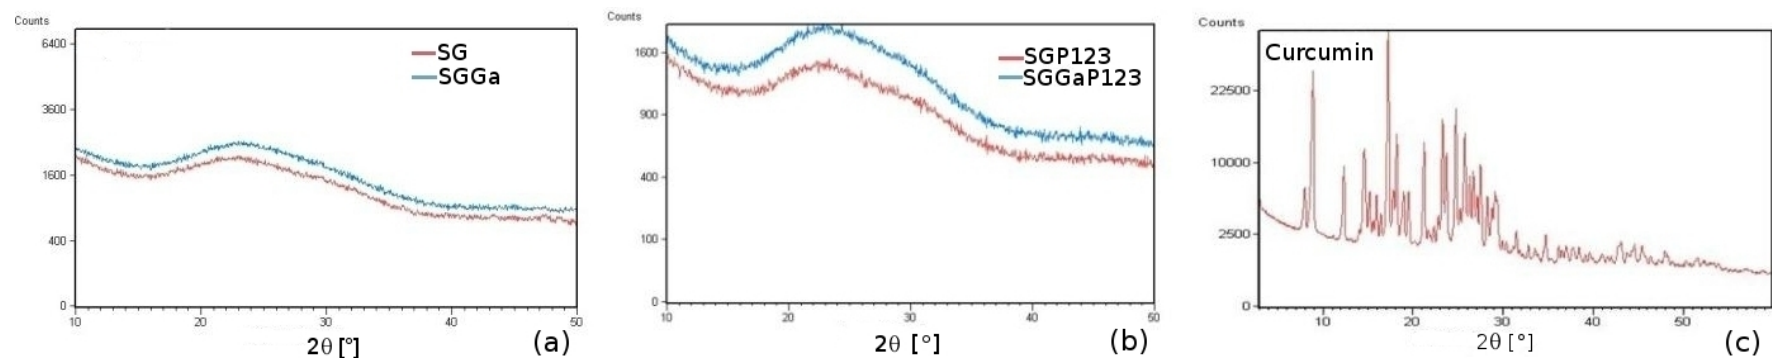

**Figure S1:** XRD powders spectra of gel glasses [section (a)], mesoporous glasses [section (b)] and Curcumin [section (c)]

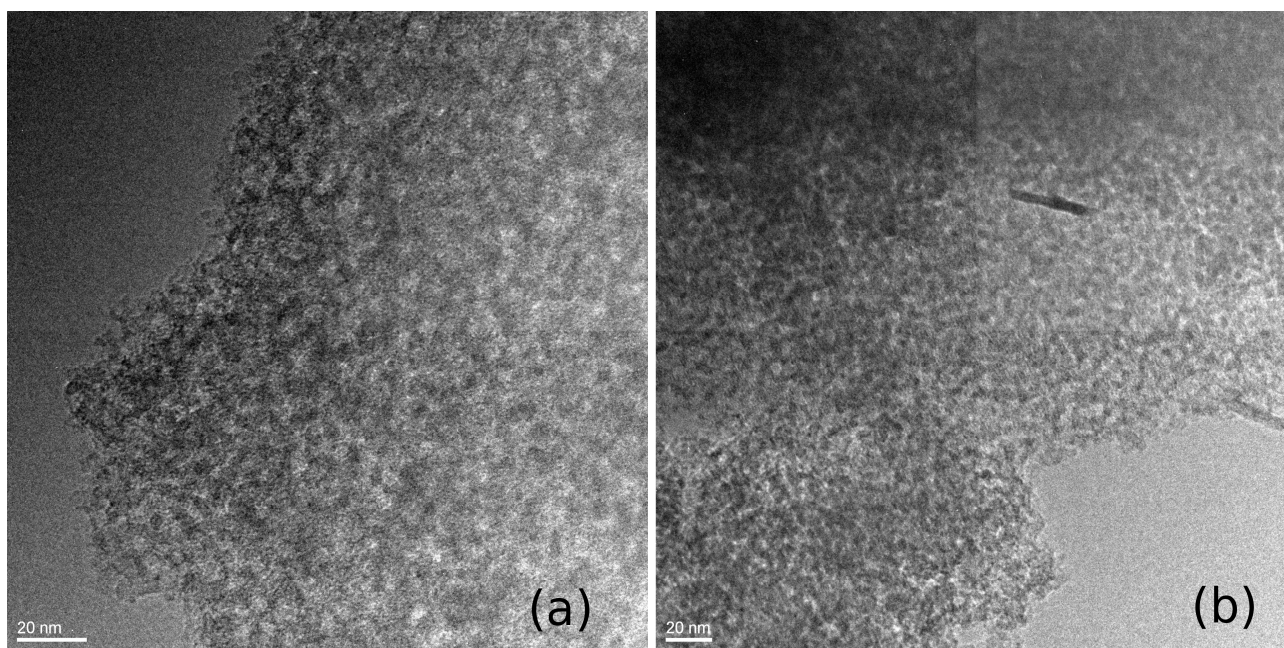

**Figure S2.** HR-TEM images of the samples SGP123 (a) and SGGaP123 (b).

5

10

15

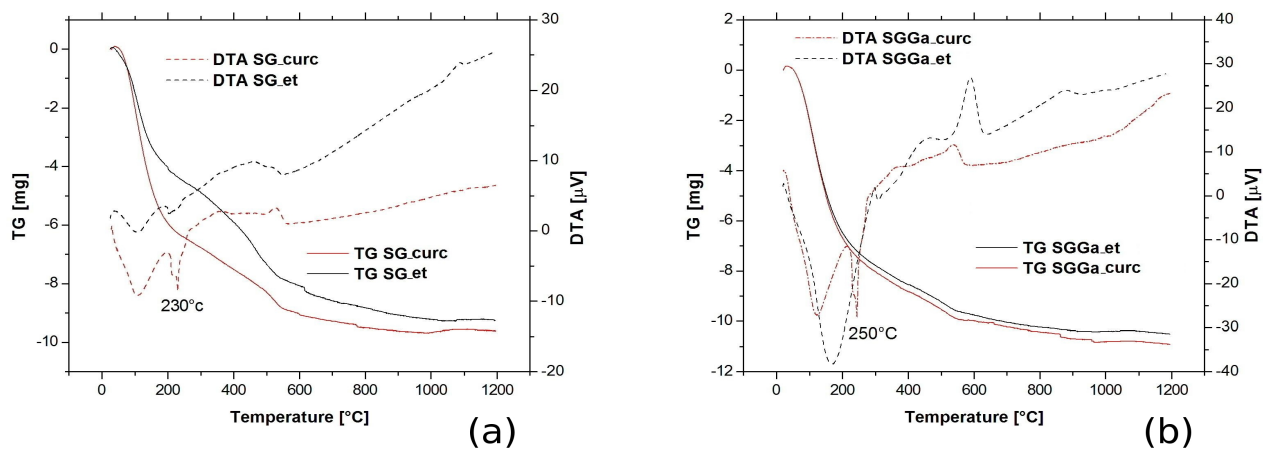

**Figure S3.** DTA and TG plots of SG gel glasses [section (a)] and SGGa gel glasses [section (b)] after treatment with only ethanol (black curves) and after Curcumin loading (red lines).
